# Supplementary material for: Development and multi-laboratory verification of U.S. EPA method 540 for the analysis of drinking water contaminants by solid phase extraction-LC/MS/MS
Source: Royal Society of Chemistry journal article supplement (doi:10.1039/c3ay41242c), 2013-12-23
Supplement: c3ay41242c.pdf [file c3ay41242c.pdf]

**Supplementary Information**  
**Paper: c3ay41242c**

**Table S1. Precision and accuracy data for method analytes in laboratory reagent water fortified at a low concentration (n=4)**

| Analyte                                                  | Fortified Conc. (ng/L) | Oasis HLB       |       | Speedisk H <sub>2</sub> O-Philic DVB |       |
|----------------------------------------------------------|------------------------|-----------------|-------|--------------------------------------|-------|
|                                                          |                        | Mean % Recovery | % RSD | Mean % Recovery                      | % RSD |
| methomyl                                                 | 4.00                   | 102             | 1.9   | 103                                  | 2.6   |
| 3-hydroxycarbofuran                                      | 4.00                   | 101             | 6.1   | 107                                  | 4.8   |
| fenamiphos sulfone                                       | 4.00                   | 101             | 3.8   | 99.6                                 | 3.1   |
| fenamiphos sulfoxide                                     | 4.00                   | 108             | 2.0   | 108                                  | 9.6   |
| phorate sulfone                                          | 4.00                   | 94.2            | 3.2   | 108                                  | 7.2   |
| phorate sulfoxide                                        | 4.00                   | 106             | 3.0   | 112                                  | 4.3   |
| disulfoton sulfoxide                                     | 4.00                   | 113             | 2.9   | 111                                  | 6.5   |
| bensulide                                                | 4.00                   | 93.6            | 5.5   | 93.0                                 | 3.0   |
| tebufenozide                                             | 1.60                   | 110             | 5.2   | 105                                  | 2.7   |
| chlorpyrifos oxon                                        | 4.00                   | 95.5            | 1.3   | 112                                  | 11    |
| fenamiphos                                               | 1.60                   | 92.6            | 6.8   | 104                                  | 6.6   |
| tebuconazole                                             | 1.60                   | 115             | 4.9   | 114                                  | 3.4   |
| methomyl- <sup>13</sup> C <sub>2</sub> , <sup>15</sup> N | 16.0                   | 101             | 3.4   | 98.1                                 | 2.1   |
| tebuconazole- <i>d</i> <sub>6</sub>                      | 16.0                   | 98.9            | 1.4   | 105                                  | 4.8   |

**Table S2. Precision and accuracy data for method analytes fortified at a low concentration in finished drinking water from a surface water source (n=4)**

| Analyte                                                  | Fortified Conc. (ng/L) | Oasis HLB <sup>a</sup> |       | Speedisk H <sub>2</sub> O-Phylic DVB <sup>b</sup> |       |
|----------------------------------------------------------|------------------------|------------------------|-------|---------------------------------------------------|-------|
|                                                          |                        | Mean % Recovery        | % RSD | Mean % Recovery                                   | % RSD |
| methomyl                                                 | 4.00                   | 104                    | 2.1   | 109                                               | 3.1   |
| 3-hydroxycarbofuran                                      | 4.00                   | 96.6                   | 4.3   | 106                                               | 3.4   |
| fenamiphos sulfone                                       | 4.00                   | 97.6                   | 2.2   | 104                                               | 4.3   |
| fenamiphos sulfoxide                                     | 4.00                   | 106                    | 3.1   | 105                                               | 7.4   |
| phorate sulfone                                          | 4.00                   | 90.3                   | 3.3   | 98.1                                              | 6.6   |
| phorate sulfoxide                                        | 4.00                   | 102                    | 5.5   | 105                                               | 5.7   |
| disulfoton sulfoxide                                     | 4.00                   | 111                    | 4.8   | 107                                               | 4.4   |
| bensulide                                                | 4.00                   | 90.4                   | 7.1   | 96.4                                              | 12    |
| tebufenozide                                             | 1.60                   | 98.9                   | 9.5   | 105                                               | 11    |
| chlorpyrifos oxon                                        | 4.00                   | 94.0                   | 4.6   | 104                                               | 7.6   |
| fenamiphos                                               | 1.60                   | 96.1                   | 3.9   | 100                                               | 3.1   |
| tebuconazole                                             | 1.60                   | 111                    | 6.6   | 120                                               | 5.2   |
| methomyl- <sup>13</sup> C <sub>2</sub> , <sup>15</sup> N | 16.0                   | 101                    | 0.8   | 103                                               | 1.9   |
| tebuconazole- <i>d</i> <sub>6</sub>                      | 16.0                   | 100                    | 2.8   | 101                                               | 3.7   |

<sup>a</sup> TOC = 1.22 mg/L and hardness = 154 mg/L as calcium carbonate.

<sup>b</sup> TOC = 1.58 mg/L and hardness = 137 mg/L as calcium carbonate.
